# Supplementary material for: Translational control of breast cancer plasticity
Source: PubMed Central journal article supplement (PMC7237473; doi:10.1038/s41467-020-16352-z), 2020-05-19
Supplement: 41467_2020_16352_MOESM1_ESM.pdf [file 41467_2020_16352_MOESM1_ESM.pdf]

# **Translational control of breast cancer plasticity**

Jewer et al

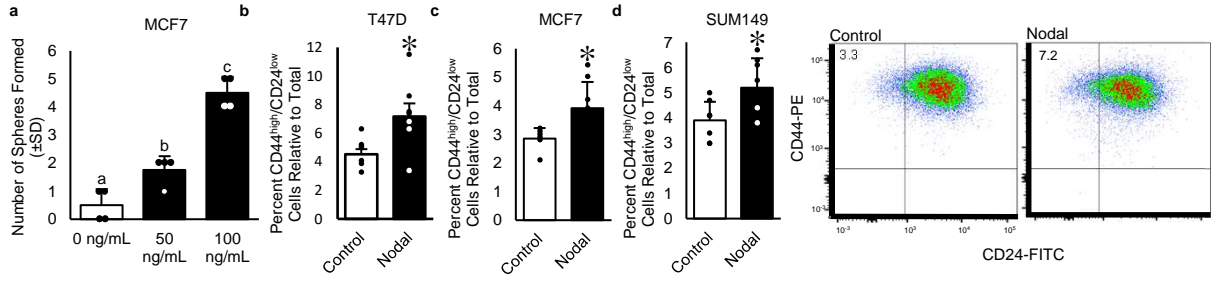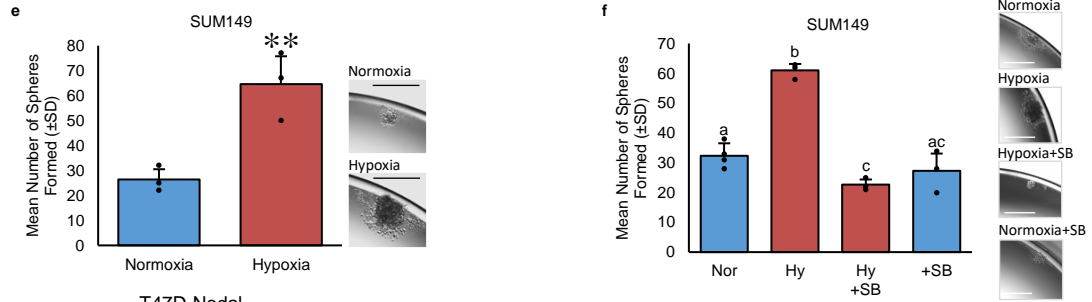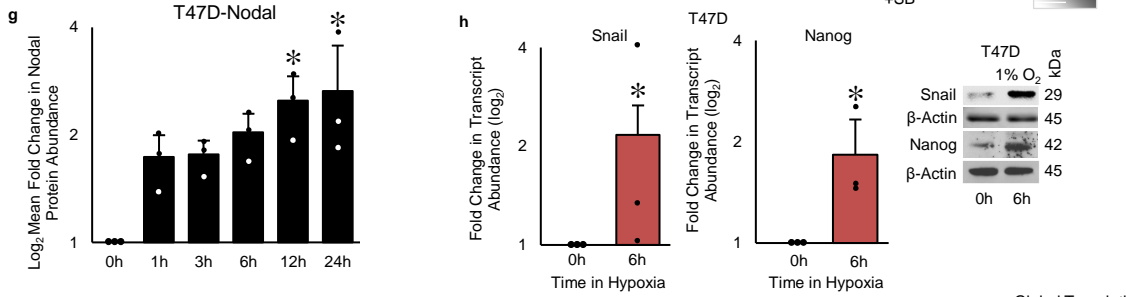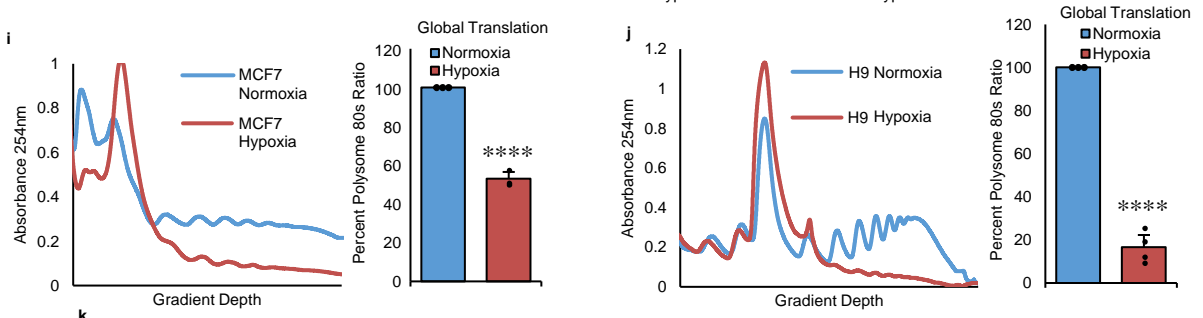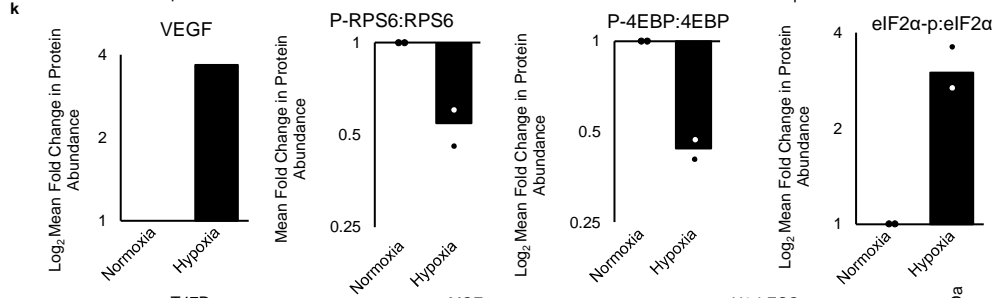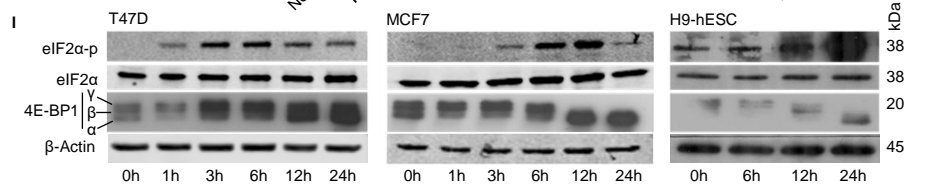

**Supplementary Figure 1:** Hypoxia induces BCSC phenotypes and translational reprogramming: a) Mean sphere counts from rhNODAL (50, 100 ng/mL) treated MCF7 cells (n=4). b-d) Mean percentage of CD44<sup>high</sup>/CD24<sup>low</sup> population of b) T47D (n=7) c) MCF7 (n=6) and d) SUM149 (n=7) following 24h rhNODAL (100ng/mL) treatment with representative scatterplots defining CD44 and CD24 subpopulations . e) Mean sphere counts from SUM149 cells pre-exposed to hypoxia or normoxia for 24h (n=3) with representative images. Micron bars = 500  $\mu$ m. f) Mean sphere counts from SUM149 cells pre-exposed to hypoxia or normoxia for 24h +/- SB431542 (10  $\mu$ M). (n=3) with representative images. Micron bars = 250  $\mu$ m. g) Mean of the densitometric analysis of Immunoblot of lysates from T47D cells treated for 0-24h in hypoxia (Fig. 1i) (n=3). h) Mean NANOG and SNAIL transcript (qRT-PCR) and protein levels (Immunoblots) in T47D cells cultured in hypoxia for 0 and 6h (n=3). Mean log<sub>2</sub> fold change in transcript relative to 0h and  $\beta$ -Actin loading control. Translation rates in i) MCF7 (n=3) and j) H9 (n=4) cells cultured in hypoxia or normoxia for 24h. Bars represent fold change of mRNA associated with polysomes (more than 3 ribosomes) in cells cultured in hypoxia versus normoxia for representative polysome profiles shown. k) Densitometric analysis of VEGF, P-RPS6 relative to RPS6, P-4EBP relative to 4EBP, and eIF2 $\alpha$ -P relative to eIF2 $\alpha$  (Fig. 1n) (n=2). l) Immunoblots of lysates from T47D breast cancer cells, MCF7 breast cancer cells and H9 hESCs exposed to 20 (normoxia) or 1% O<sub>2</sub> (hypoxia) for 0-24h show that low O<sub>2</sub> reduces 4E-BP phosphorylation (indicated by a increase in the  $\alpha$  and  $\beta$  bands and a relative decrease in the  $\gamma$  band) by 12h, and increases eIF2 $\alpha$  phosphorylation between 3 and 12h. 4E-BP1,  $\beta$ -Actin and eIF2 $\alpha$  levels were unchanged (n=3). Hypoxia denoted in red and normoxia blue. Data represents independent experiments. Error bars indicate mean  $\pm$  SD. Two-sided t-test for paired samples. The asterisks denote p-values < \*0.05, \*\*0.01, \*\*\*\*0.0001. Multiple comparisons tested by ANOVA. The same letters indicate relationships with a p $\geq$ 0.05. Different letters indicate statistical differences (p<0.05).

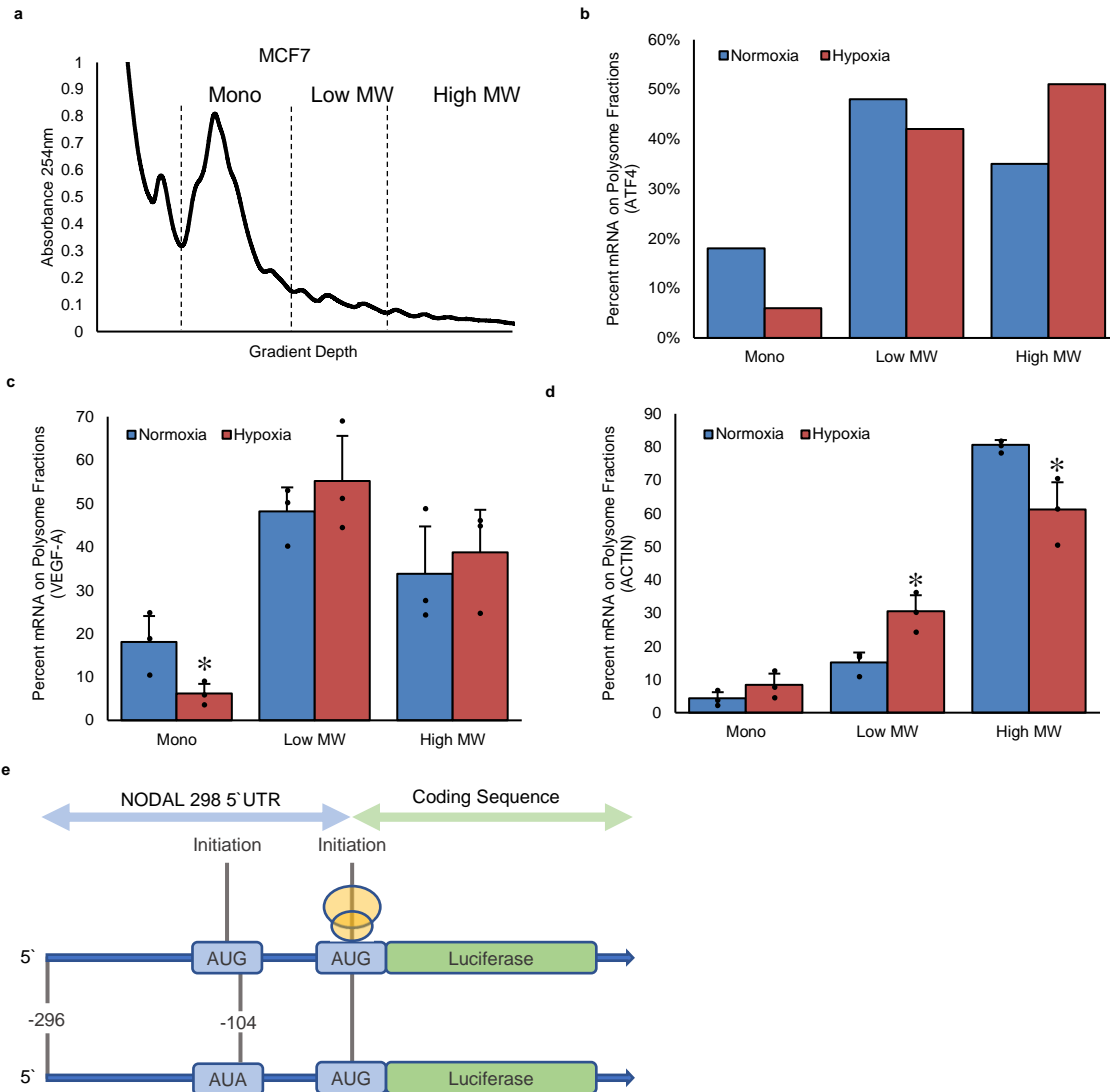

**Supplementary Figure 2: Hypoxia induces the selective translation of BCSC-associated transcripts in an isoform-specific manner.** a) Representative polysome profile from MCF7 demonstrating the fractions from which monosomes, Low MW polysomes (<4) and High MW polysomes (>4) were taken. b) Percent of ATF4 mRNA associated with monosomes, low MW polysomes and high MW polysomes extracted from MCF7 cells cultured for 24h in hypoxia or normoxia. Bars represent the percent of transcript associated with each fraction in each condition. A representative biological replicate is shown (n=1). c) Mean percentage of VEGF (n=3) and d)  $\beta$ -ACTIN (n=4) mRNA associated with monosomes, low MW polysomes and high MW polysomes extracted from MCF7 cells cultured for 24h in hypoxia or normoxia. Bars represent the percent of transcript associated with each fraction in each condition  $\pm$  SD (n=3). e) Sequence diagram of the NODAL 298 nt 5'UTR highlighting the uORF. Hypoxia denoted in red and normoxia blue. Data represents independent experiments. Error bars indicate mean  $\pm$  SD. Two-sided t-test for paired samples. The asterisks denote p-values < \*0.05.

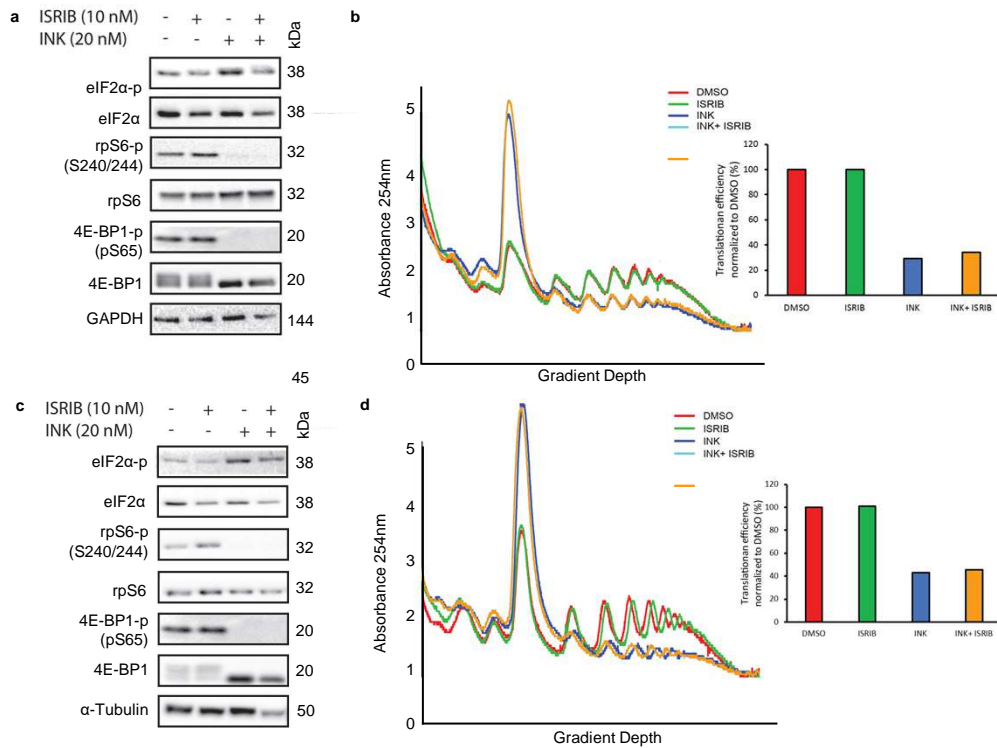

**Supplementary Figure 3: mTOR inhibition induces the selective translation of BCSC-associated transcripts in an isoform-specific manner. a)** Western blot analysis of key translation regulating proteins (p-EIF2 $\alpha$ , 4E-BP1, p-RPS6) in response to ISIRIB, INK and INK and ISIRIB with respective loading controls (EIF2 $\alpha$ , 4E-BP1, RPS6) from T47D lysate. **b)** Second replicate polysome profile from MCF7 demonstrating overall changes in translational efficiency. **c)** Western blot analysis of key translation regulating proteins (p-EIF2 $\alpha$ , 4E-BP1, p-RPS6) in response to ISIRIB, INK and INK and ISIRIB with respective loading controls (EIF2 $\alpha$ , 4E-BP1, RPS6) from T47D lysate. **d)** Third replicate polysome profile from MCF7 demonstrating overall changes in translational efficiency.

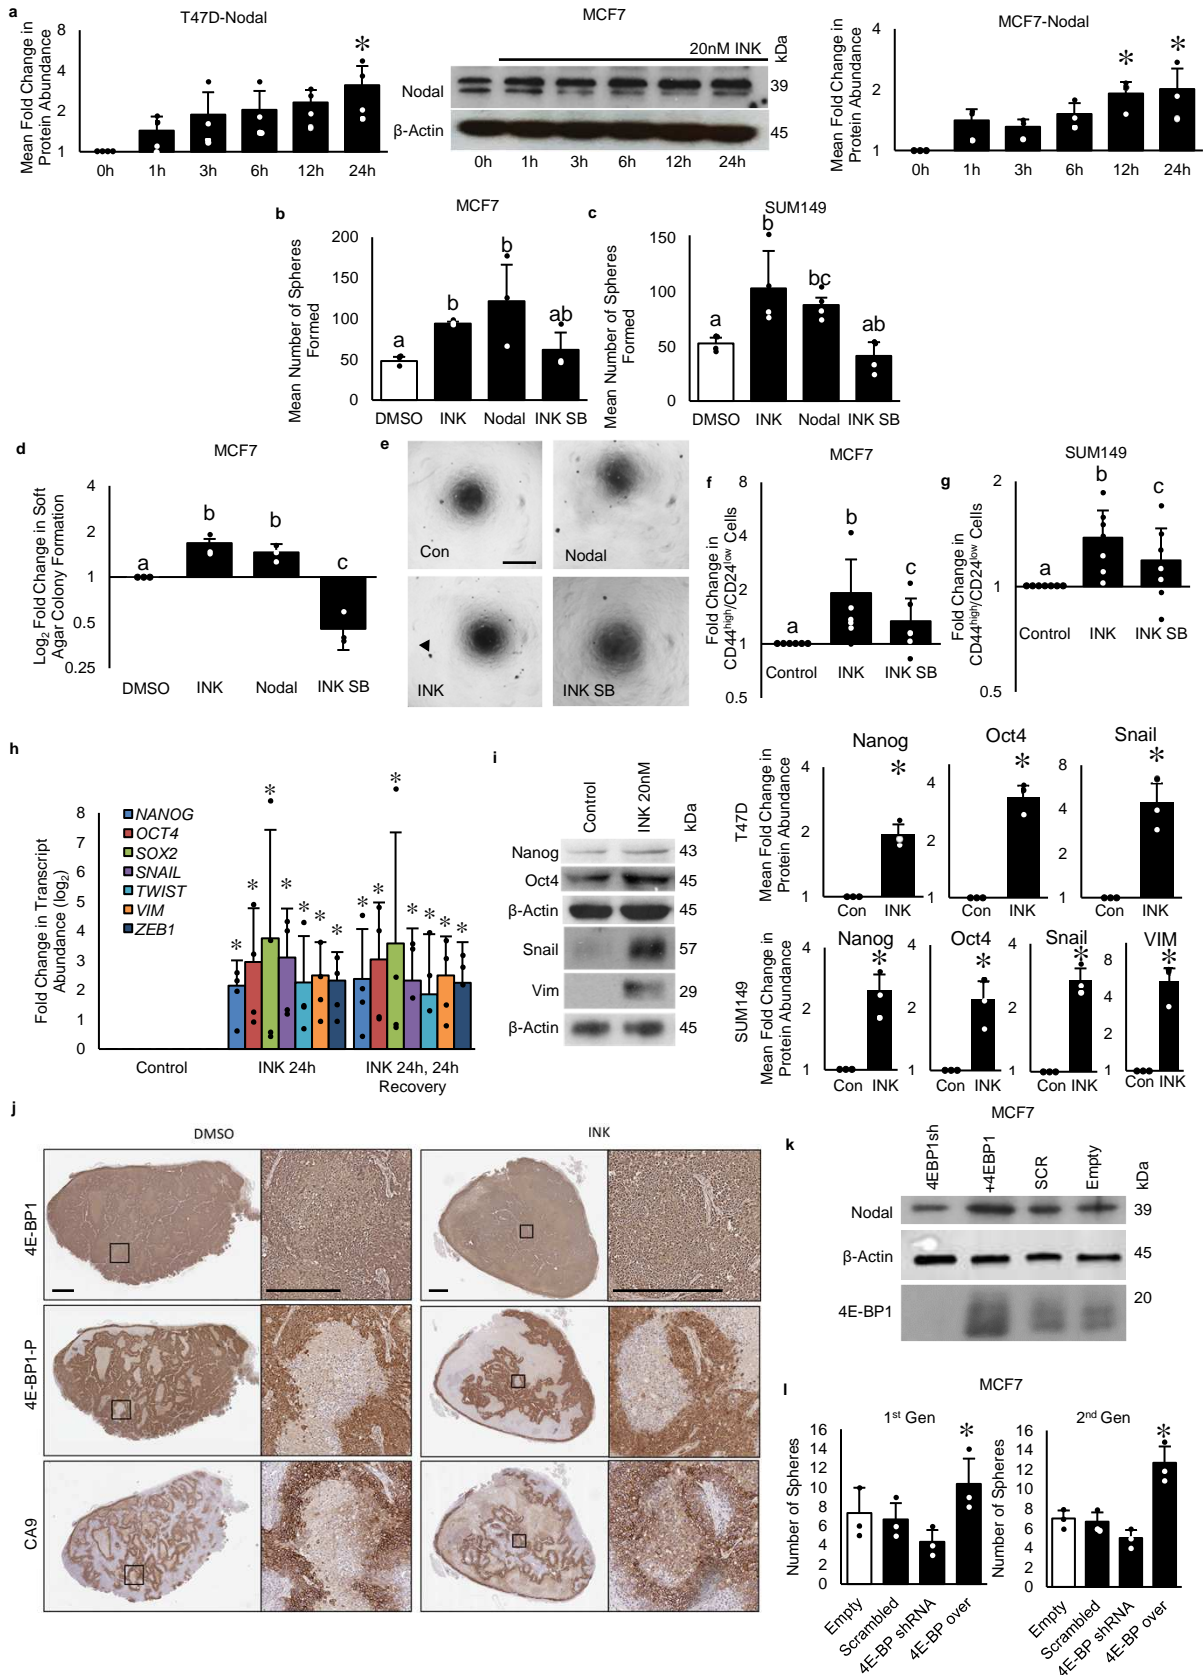

**Supplementary Figure 4: MTOR inhibition induces breast cancer plasticity:** a) Densitometric analysis of NODAL immunoblots from 0-24h 20nM INK treated T47D cells Fig. 4a). NODAL immunoblot and densitometric analysis of 0-24h 20nM INK treated MCF7 cells with  $\beta$ -Actin loading control (n=3). b,c) Mean sphere counts from b) MCF7 and c) SUM149 cells pre-exposed to DMSO, INK (20nM), rhNODAL (100 ng/mL) or INK + SB431542 (10  $\mu$ M) for 24h (n=4) with representative sphere images. d,e) Mean s colonies formed from d) MCF7 cells pre-exposed to DMSO, INK (20nM), rhNODAL (100 ng/mL) or INK + SB431542 (10  $\mu$ M) for 24h with representative images. (n=3). Micron bars = 1000  $\mu$ m f,g) Mean percentage of CD44high/CD24low f) MCF7 (n=7) and g) SUM149 (n=6) cells following DMSO, INK, INK+SB431542 or INK with 24h washed out treatment. h) Mean log2 fold change relative to control qRT-PCR quantification of NANOG, SOX2, OCT4, TWIST, ZEB1, SNAIL, VIM transcripts from 24h treated DMSO or INK (20 nM) SUM149 cells (n=4). i) Relative mean protein expression by immunoblot and densitometric analyses of NANOG, OCT4, SNAIL, VIM in SUM149 cells cultured for 24h in DMSO or INK (20 nM) with  $\beta$ -Actin loading control (n=3). Mean protein expression by densitometric analysis of immunoblots from (Fig. 4f) 24h DMSO or INK (20 nM) treated T47D cells (n=3). j) Immunohistochemical detection (brown) of phospho-4E-BP1, total 4E-BP1 and CA9 in PDX 401 tumours taken from mice treated every second day for 2 weeks with either DMSO or INK (30 mg/kg). Micron bars = 1000  $\mu$ m and 250  $\mu$ m. k) Immunoblot for NODAL and 4E-BP1 in MCF7 cells stably transfected with 4E-BP1 shRNA, a shRNA scrambled (SCR) control, a 4E-BP1 ORF or an empty vector with  $\beta$ -Actin loading control. l) Mean first and second generation spheres formed from MCF7 cells transfected with vectors as described in k) (n=3) with representative images. Data represents independent experiments. Error bars indicate mean  $\pm$  SD. Two-sided t-test for paired samples. The asterisks denote p-values < \*0.05. Multiple comparisons tested by ANOVA. The same letters indicate relationships with a  $p \geq 0.05$ . Different letters indicate statistical differences ( $p < 0.05$ ).

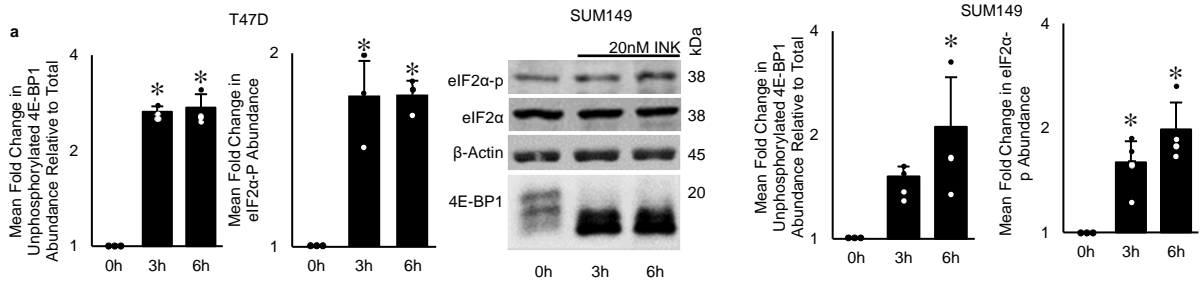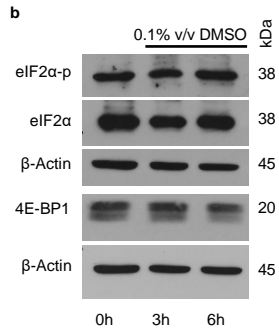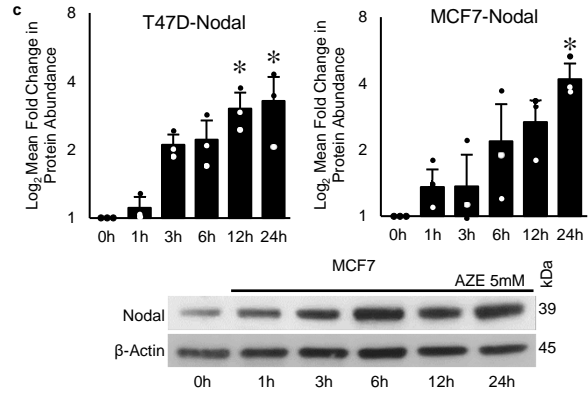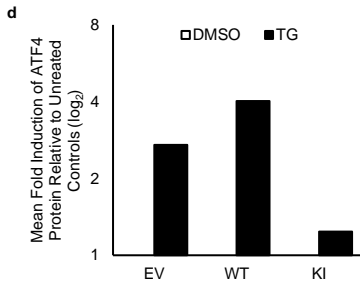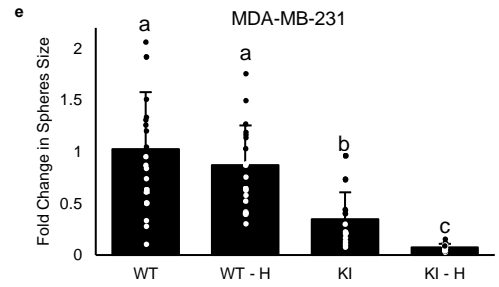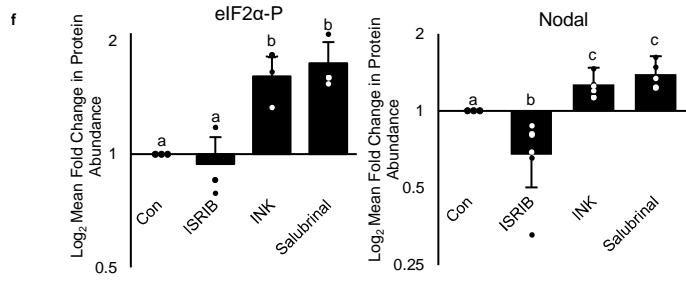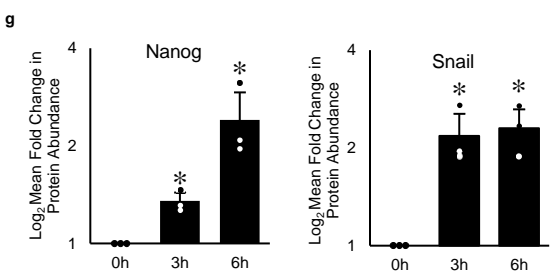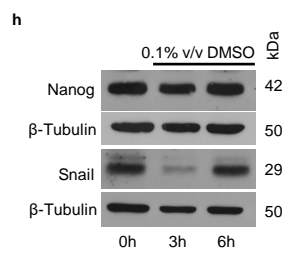



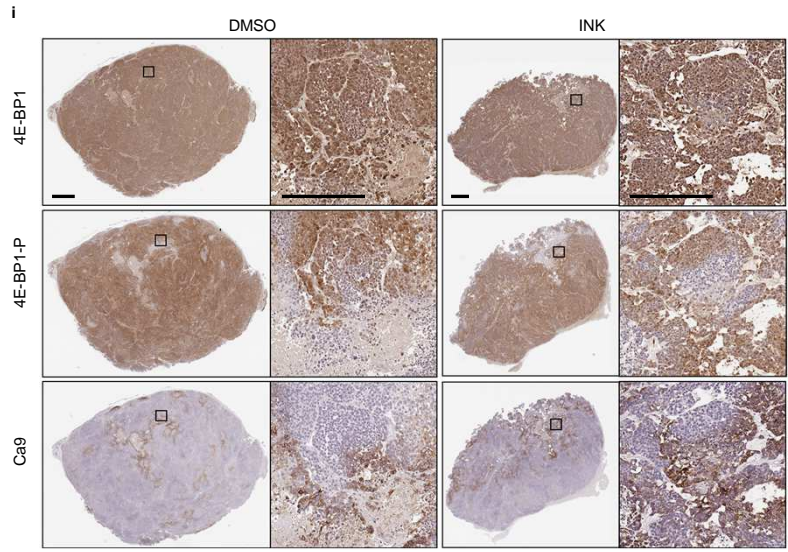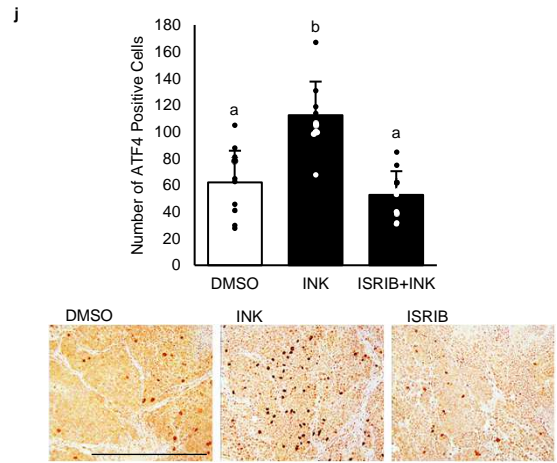

**Supplementary Figure 5: Stress-induced plasticity is mediated by the ISR:** a) Mean densitometric analysis of protein expression by immunoblots (0, 3 or 6h with INK 20 nM treated T47D cells (Fig. 5a)). Mean protein expression of eIF2 $\alpha$ -p, eIF2 $\alpha$  and 4E-BP1 from 0, 3 or 6h with INK 20 nM treated SUM149 cells (n=4). b) eIF2 $\alpha$ -p, eIF2 $\alpha$  and 4E-BP1 immunoblot analysis of T47D cells treated for 0, 3 or 6h with 0.1% v/v DMSO solvent. c) Mean protein expression by densitometric analysis of NODAL immunoblot from 0-24h AZE (5mM) treated T47D cells (n=3). d) Densitometric analysis of for mean protein expression of ATF4 immunoblots from MDA-MB-231 cells (vehicle or TG) expressing an empty vector (EV), a wild type eIF2 $\alpha$  (WT) or an eIF2  $\alpha$  mutant normalized to untreated expression of ATF4. e) Area of spheres formed by MDA-MB-231 variants described in (Fig. 5c), 24h pre-exposure to hypoxia or normoxia (Fig. 5e) (n=3). f) Densitometric analysis of eIF2 $\alpha$ -p and eIF2 $\alpha$  immunoblots from 24h vehicle, ISRIB (10nM), INK 20 nM or Salubrinal (20 $\mu$ M) treated T47D cells (Fig. h) (n=3). g) Densitometric analysis of NANOG and SNAIL immunoblots in 0,3 or 6h with Salubrinal (20 $\mu$ M) treated T47D cells (Fig. 5g). h) NANOG, and SNAIL immunoblot analysis from 0, 3 or 6h with 0.1% v/v DMSO T47D cells.  $\beta$ -Tubulin was used as a loading control i) Immunohistochemical detection (brown) of phospo-4E-BP1, total 4E-BP1 and CA9 in SUM149 tumours from mice treated every second day for 2 weeks with DMSO or INK (30 mg/kg). Micron bars = 500  $\mu$ m. j) Immunohistochemical detection (brown) of ATF4 in SUM149 tumours from mice treated every second day for 2 weeks with DMSO (n=12), INK (30 mg/kg) (n=9) or INK+ISRIB (2.5 mg/kg) (n=3). Micron bars = 400  $\mu$ m. Data represents independent experiments. Error bars indicate mean  $\pm$  SD. Two-sided t-test for paired samples. The asterisks denote p-values < \*0.05 ( c) and g) ANOVA vs control).Multiple comparisons tested by ANOVA. The same letters indicate relationships with a p $\geq$ 0.05. Different letters indicate statistical differences (p<0.05).

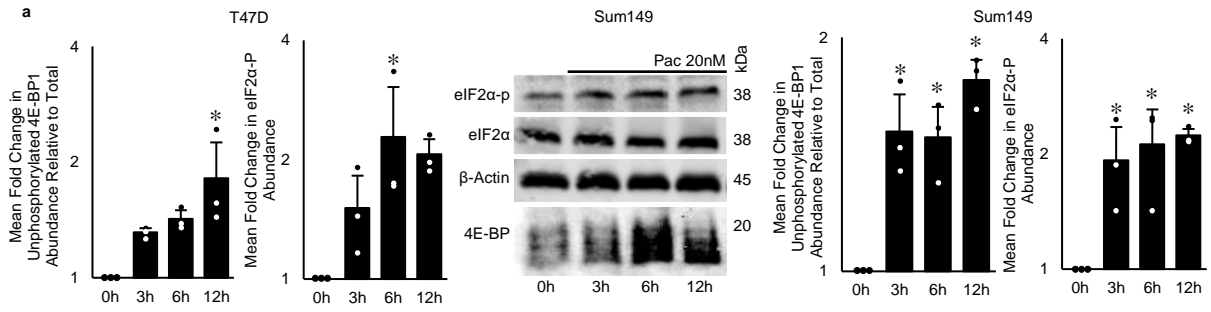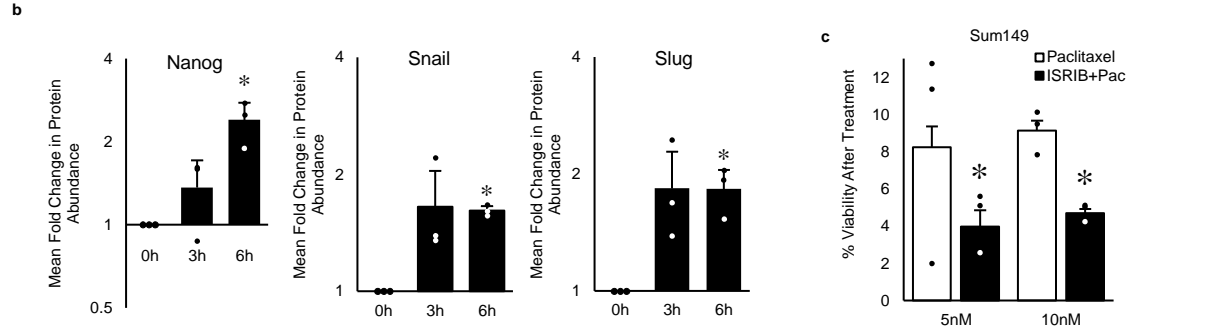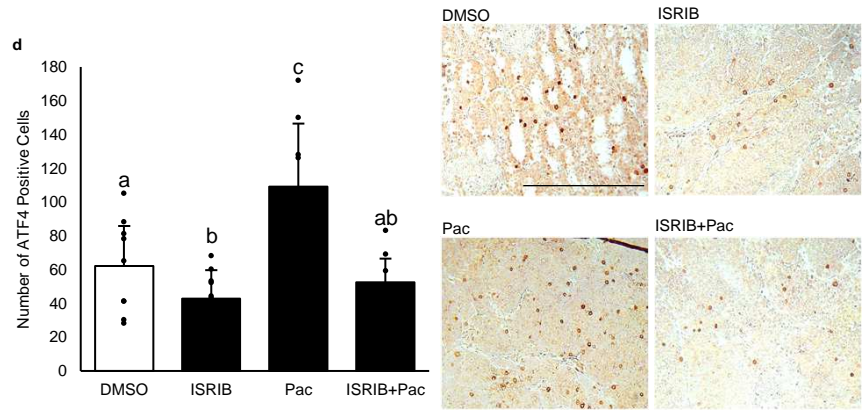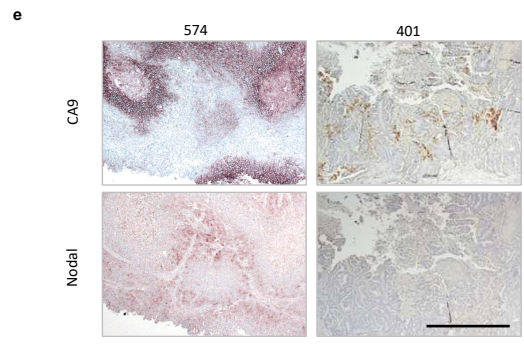

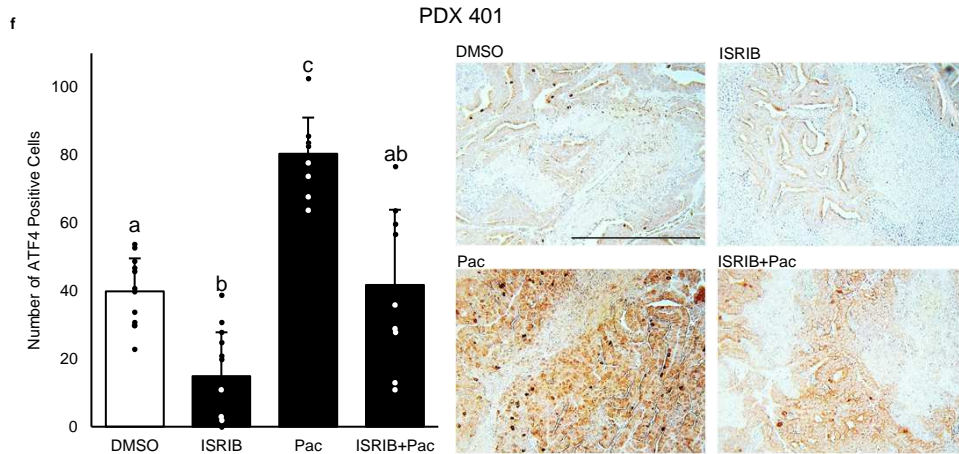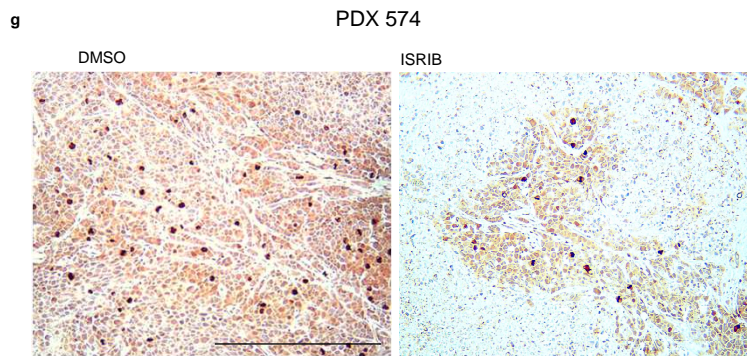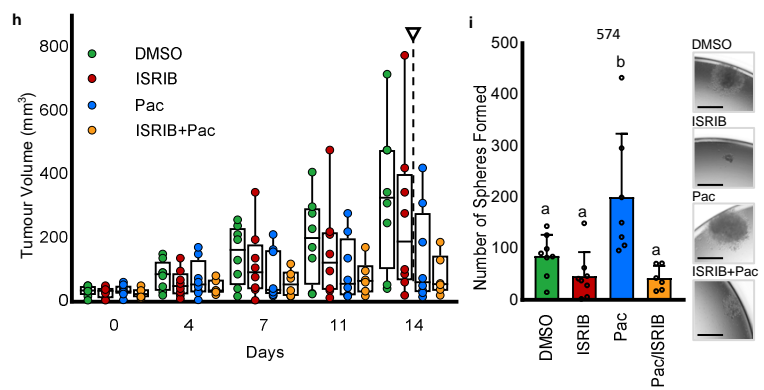

**Supplementary Figure 6: ISRIB mitigates therapy-induced BCSCs and improves efficacy of paclitaxel:**

a) Densitometric analysis of mean protein expression of eIF2 $\alpha$ -p, eIF2 $\alpha$  and 4E-BP1 immunoblots from 0-12h with paclitaxel (20nM) treated T47D cells (Fig 6a). eIF2 $\alpha$ -p, eIF2 $\alpha$  and 4E-BP1 immunoblots and densitometric analysis of 0-12h with paclitaxel (20nM) treated SUM149 cells.  $\beta$ -Actin loading control (n=3). b) Mean protein expression (densitometry) of NANOG (n=4) and SNAIL (n=4), SLUG (n=3) immunoblots from 0,3 or 6h paclitaxel treated T47D cells (20nM) (Fig. 6b). c) Mean colony formation of the surviving fractions of 5 nM and 10nM paclitaxel treated SUM149 cells  $\pm$  ISRIB (10nM) ( $p < 0.05$ , n=3). d) Immunohistochemical detection (brown) of ATF4 in SUM149 tumours from mice treated every second day for 2 weeks with DMSO, ISRIB (2.5 mg/kg), paclitaxel (20 mg/kg), or paclitaxel+ISRIB (2.5 mg/kg). Mean number of ATF+ cells per field of view (n=3). Micron bars = 400  $\mu$ m. e) Immunohistochemical analysis of CA9 and NODAL (brown) PDX lines 401 and 574. Micron bars = 500  $\mu$ m. f,g) Immunohistochemical detection (brown) of ATF4 in f) the mean number of ATF+ cells per field of view in PDX401 tumours from mice treated as in d) ( $p < 0.01$ , n=3) with representative images. Micron bars = 400  $\mu$ m. g) Representative images of DMSO, ISRIB (2.5 mg/kg) treated 574 PDX tumor h) PDX574 tumour volumes in mice treated every second day for 2 weeks with DMSO, ISRIB (10 mg/kg oral), paclitaxel (20 mg/kg), or paclitaxel (20 mg/kg)+ISRIB (10 mg/kg oral). Arrows indicate treatment cessation (n=8). Micron bars = 400  $\mu$ m i) Mean sphere count from 96000 PDX574 cells dissociated from endpoint tumours from h) (n=6) with representative images. Micron bars = 500  $\mu$ m. Data represents independent experiments. Error bars indicate mean  $\pm$  SD. Two-sided t-test for paired samples. The asterisks denote p-values  $< *0.05$  ( a) and b) ANOVA vs control). Multiple comparisons tested by ANOVA. The same letters indicate relationships with a  $p \geq 0.05$ . Different letters indicate statistical differences ( $p < 0.05$ ). Box and whisker plots represent median, interquartile range (IQR), whiskers extend to maximum and minimum.

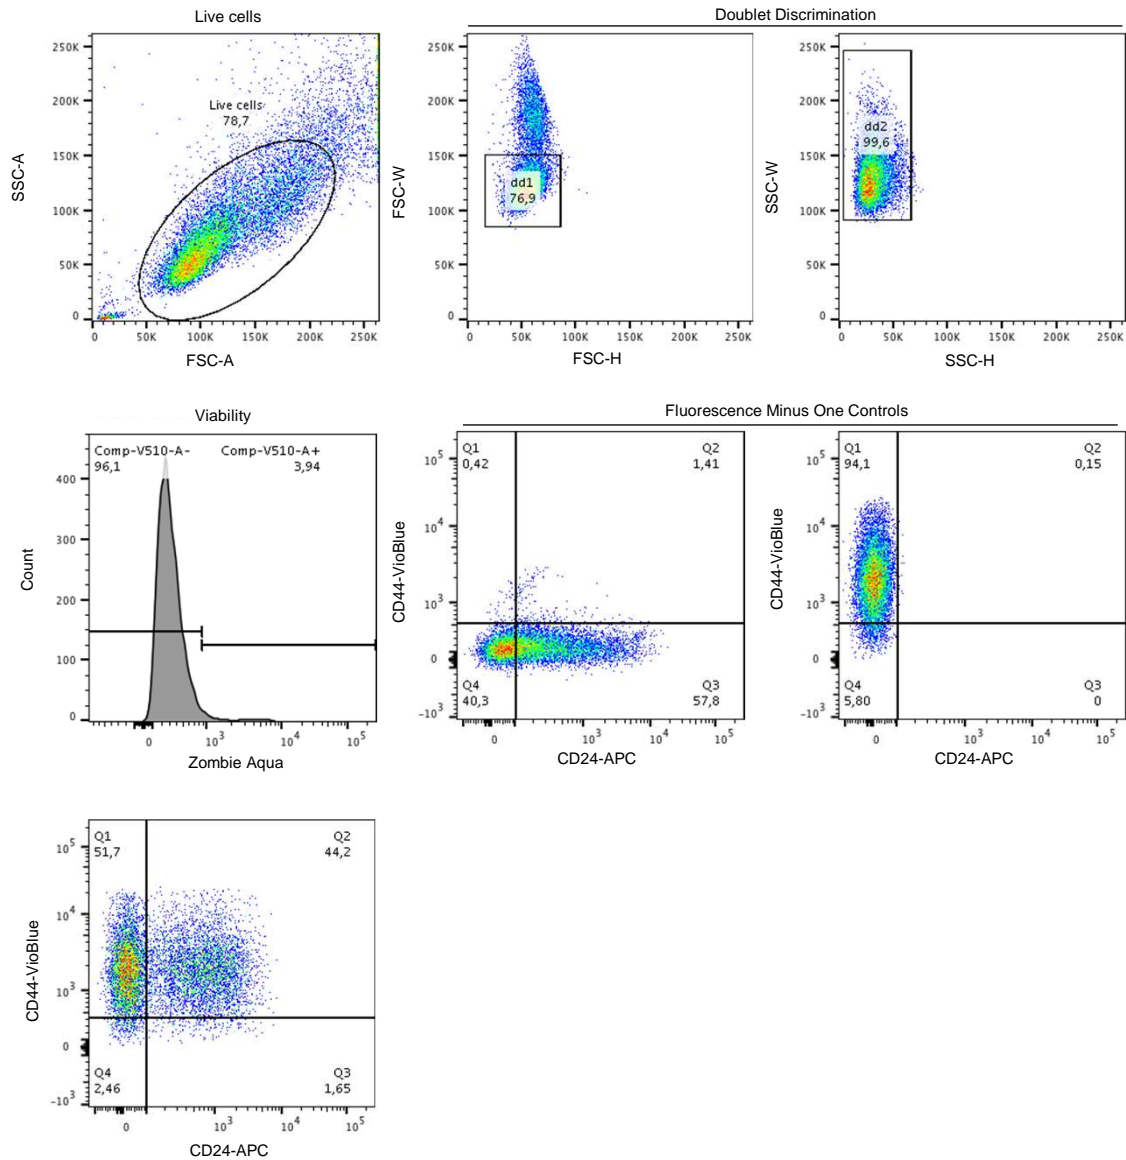

**Supplementary Figure 7: Schema of gating as described in the methods:** Live cell gating using SSC-A and FSC-A (live cells), doublet discrimination gate (dd1) using FSC-H and FSC-W and SSC-H and SSC-W (dd2). Viable cells, unstained by Zombie Aqua, were selected in gate Com-V510-A-. Fluorescence minus one controls were used to set a quadrant gate to measure DC44<sup>High</sup> CD24<sup>low</sup> cells (Q1). Final panel displayed in figures.

Supplementary Table 1. Top 50 Gene Most Altered by Hypoxia in T47D Breast Cancer Cells

| genes        | logFC      | PValue    | FDR | genes               | logFC       | PValue     | FDR        |
|--------------|------------|-----------|-----|---------------------|-------------|------------|------------|
| LINC01512    | 9.35074659 | 1.21E-28  |     | 6.32E-27 LINC00867  | -4.78129481 | 4.3956E-31 | 2.8285E-29 |
| LINC02395    | 9.00859457 | 7.06E-27  |     | 3.26E-25 LINC02303  | -3.89059199 | 3.5347E-19 | 7.466E-18  |
| SEMA5B       | 7.67814516 | 2.45E-42  |     | 3.32E-40 LINC01016  | -3.87236614 | 8.8952E-07 | 3.6659E-06 |
| FAM131B      | 7.01146416 | 4.10E-29  |     | 2.19E-27 YEATS2-AS1 | -3.49661148 | 2.0383E-15 | 2.8953E-14 |
| LOC100506688 | 6.97537833 | 1.47E-27  |     | 7.07E-26 C1orf64    | -3.42521174 | 8.7727E-23 | 2.7459E-21 |
| GGTA1P       | 6.94943554 | 1.92E-24  |     | 7.01E-23 NXPH3      | -3.28537879 | 1.0571E-20 | 2.6091E-19 |
| BPIFB2       | 6.84297093 | 7.83E-27  |     | 3.59E-25 KRT13      | -3.26754252 | 3.709E-22  | 1.058E-20  |
| FGD5         | 6.66042509 | 1.40E-109 |     | 1.94E-106 PXDNL     | -3.21664267 | 1.2922E-19 | 2.8639E-18 |
| IGFBP3       | 6.64408453 | 8.51E-66  |     | 4.06E-63 RANBP3L    | -3.03710531 | 1.8834E-36 | 1.778E-34  |
| MMP13        | 6.58612463 | 2.46E-43  |     | 3.55E-41 CXCL14     | -2.91694602 | 0.00332046 | 0.00673093 |
| HEPHL1       | 6.47536632 | 1.49E-34  |     | 1.20E-32 KCNK5      | -2.90277354 | 6.7285E-20 | 1.5336E-18 |
| PPP1R3C      | 6.46561743 | 2.53E-21  |     | 6.66E-20 PGR        | -2.88906536 | 2.5139E-38 | 2.5203E-36 |
| MAP7D2       | 6.29095787 | 2.27E-87  |     | 2.09E-84 ST8SIA1    | -2.87260305 | 3.6078E-09 | 2.1796E-08 |
| PNMA2        | 6.23906873 | 5.15E-73  |     | 2.97E-70 DYNNC11    | -2.71305143 | 4.7474E-15 | 6.452E-14  |
| TGFBI        | 6.21467406 | 3.23E-159 |     | 1.12E-155 LRRN3     | -2.62060571 | 5.2721E-14 | 6.2933E-13 |
| SYT11        | 6.08408738 | 2.23E-38  |     | 2.25E-36 BCL2       | -2.59213144 | 9.9405E-49 | 2.183E-46  |
| GABRA2       | 5.95145268 | 2.94E-40  |     | 3.57E-38 RASL11B    | -2.58936217 | 9.5935E-25 | 3.6264E-23 |
| SPX          | 5.92568566 | 1.16E-26  |     | 5.16E-25 SFXN2      | -2.55880527 | 8.4101E-48 | 1.6388E-45 |
| PTGS1        | 5.88553584 | 4.19E-154 |     | 1.16E-150 TRPC6     | -2.51808971 | 6.3364E-20 | 1.4466E-18 |
| MOV10L1      | 5.87351177 | 6.43E-40  |     | 7.48E-38 MAP6D1     | -2.45502009 | 3.5645E-73 | 2.1441E-70 |
| BEST1        | 5.82705475 | 9.61E-103 |     | 1.02E-99 SUSD3      | -2.44921078 | 1.9115E-37 | 1.8494E-35 |
| NBPF18P      | 5.82306978 | 4.39E-26  |     | 1.89E-24 LINC01695  | -2.4377088  | 5.6537E-08 | 2.8526E-07 |
| EPHA3        | 5.81042545 | 8.32E-35  |     | 6.85E-33 MARC1      | -2.42498221 | 1.026E-47  | 1.9714E-45 |
| CYP26A1      | 5.75859213 | 6.48E-111 |     | 9.96E-108 PLIN4     | -2.36323604 | 4.5469E-17 | 7.6622E-16 |
| STRA6        | 5.75764828 | 1.89E-36  |     | 1.78E-34 CTPS1      | -2.34479867 | 3.658E-22  | 1.0456E-20 |
| SLCO2A1      | 5.71992024 | 7.26E-47  |     | 1.29E-44 ELOVL2     | -2.33036229 | 5.5155E-05 | 0.00016298 |
| GAD1         | 5.71312983 | 5.74E-35  |     | 4.82E-33 PDZK1      | -2.3287898  | 9.8651E-05 | 0.00027791 |
| RORA         | 5.58903112 | 1.34E-27  |     | 6.46E-26 PTGES      | -2.29552548 | 3.9177E-25 | 1.5355E-23 |
| SPRR1A       | 5.56936701 | 2.24E-31  |     | 1.46E-29 CAND2      | -2.28306224 | 3.5501E-12 | 3.3254E-11 |
| EGLN3        | 5.53310809 | 1.10E-43  |     | 1.63E-41 OLFML3     | -2.23614246 | 1.7887E-54 | 5.755E-52  |
| LOX          | 5.49203174 | 3.83E-109 |     | 4.82E-106 SOWAHA    | -2.23381915 | 9.9952E-21 | 2.4871E-19 |
| TMEM45A      | 5.46159251 | 5.77E-136 |     | 1.33E-132 PGR-AS1   | -2.22576912 | 6.4289E-14 | 7.5633E-13 |
| HPCAL4       | 5.41296668 | 1.87E-30  |     | 1.12E-28 NDST4      | -2.17342335 | 6.5468E-11 | 5.1581E-10 |
| SLC28A1      | 5.38870944 | 3.95E-32  |     | 2.68E-30 CAB39L     | -2.16908439 | 3.0361E-21 | 7.9403E-20 |
| OPRK1        | 5.37918209 | 6.94E-22  |     | 1.93E-20 SYN1       | -2.15992049 | 0.00020624 | 0.00054411 |
| CA9          | 5.34052635 | 1.20E-39  |     | 1.35E-37 CLPS1      | -2.14690968 | 1.4361E-25 | 5.8607E-24 |
| TMPRSS11E    | 5.23354861 | 1.60E-28  |     | 8.27E-27 PHACTR1    | -2.14503016 | 9.1154E-24 | 3.0834E-22 |
| INHBA        | 5.20708476 | 1.69E-48  |     | 3.65E-46 GRIK4      | -2.14363726 | 3.8629E-22 | 1.0997E-20 |
| LOC105370526 | 5.18716145 | 5.35E-59  |     | 2.11E-56 PLA2G4F    | -2.14129025 | 1.3652E-21 | 3.6962E-20 |
| SCN5A        | 5.16350964 | 1.48E-38  |     | 1.53E-36 GABRG2     | -2.13319985 | 2.4836E-14 | 3.0844E-13 |
| WNT11        | 5.16003374 | 1.55E-24  |     | 5.78E-23 SIPA1      | -2.1321608  | 2.6112E-45 | 4.3007E-43 |
| BGN          | 5.1179712  | 3.77E-47  |     | 6.86E-45 KCNH1      | -2.11852948 | 1.9713E-25 | 7.998E-24  |
| HEY1         | 5.11669441 | 4.56E-51  |     | 1.24E-48 GSTM3      | -2.1125358  | 4.924E-64  | 2.1975E-61 |
| RASSF10      | 5.0750622  | 4.49E-30  |     | 2.62E-28 RBM24      | -2.0991275  | 1.55E-76   | 1.0212E-73 |
| NGFR         | 5.05728636 | 2.28E-33  |     | 1.73E-31 PGP        | -2.06515789 | 1.4602E-12 | 1.4348E-11 |
| ATOH8        | 5.02599427 | 1.16E-30  |     | 7.15E-29 ARHGAP15   | -2.06007209 | 6.5484E-16 | 9.7942E-15 |
| LOC100128076 | 4.96691914 | 6.65E-22  |     | 1.86E-20 LINC00565  | -2.05971214 | 2.1392E-11 | 1.8146E-10 |
| SERPINE1     | 4.95740356 | 5.65E-10  |     | 3.87E-09 TMEM52B    | -1.98960074 | 1.602E-35  | 1.394E-33  |
| INHBE        | 4.94966989 | 1.68E-49  |     | 4.00E-47 PART1      | -1.9685209  | 1.0912E-07 | 5.2641E-07 |
| CAND1.11     | 4.94632674 | 1.88E-28  |     | 9.58E-27 GPD1       | -1.93696686 | 9.301E-10  | 6.1422E-09 |

Supplementary Table 2. Antibodies Used

| Target           | Cat #       | Protocol | Dilution      | Source         | Validation                                                                                                                                                                                                                                                                                                                                                                                                             |
|------------------|-------------|----------|---------------|----------------|------------------------------------------------------------------------------------------------------------------------------------------------------------------------------------------------------------------------------------------------------------------------------------------------------------------------------------------------------------------------------------------------------------------------|
| 4E-BP1           | 9644        | WB/IHC   | 1:1000/1:1200 | Cell Signaling | 4E-BP1 (53H11) Rabbit mAb<br><br>Western blot validation has been done in multiple cells lines (CF-7 HepG2 HeLa 293 PANC1 RD A204 SH-SY5Y), IHC was performed with a blocking peptide control, and specificity was verified in knockout animal models.<br><br>Species Reactivity: Human, Mouse, Rat, Monkey                                                                                                            |
| $\beta$ -Actin   | sc47778     | WB       | 1:1000        | Santa Cruz     | Product citations: 1102<br>$\beta$ -Actin Antibody (C4) Mouse mAb<br><br>Western blot use has been verified in multiple cell lines.                                                                                                                                                                                                                                                                                    |
| ATF4             | 11815       | WB       | 1:1000        | Cell Signaling | Product citations: <5000<br>ATF-4 (D4B8) Rabbit mAb<br><br>Validation was performed using ER stress induction by tunicamycin in two different cell lines (293 and HeLa cells).                                                                                                                                                                                                                                         |
| ATF4             | ab31390     | IHC      | 1:1000        | Abcam          | Product citations: 115<br>ATF4 ab31390 Rabbit pAb<br><br>Validated by staining ATF-4 in human breast carcinoma tissue compared against the same tissue in the presence of a blocking peptide.                                                                                                                                                                                                                          |
| CA9              | 5648        | IHC      | 1:1000        | Cell Signaling | Reacts with: Mouse, Human<br>CA9 (D10C10) Rabbit mAb<br><br>Validated against multiple cell lines (LN18 and SW620), and the human colon where it shows the same localization as in the protein atlas.<br><a href="https://www.proteinatlas.org/ENSG00000107159-CA9/tissue/colon">https://www.proteinatlas.org/ENSG00000107159-CA9/tissue/colon</a>                                                                     |
| CA9              | ab108351    | IHC      | 1:100         | Abcam          | Species Reactivity: Human<br>CA9 ab108351 Rabbit mAb<br><br>Validated for western blot against HT-29 and human stomach, and for IHC in the human stomach, where it shows the same tissue and cellular localization as in the protein atlas.<br><a href="https://www.proteinatlas.org/ENSG00000107159-CA9/tissue/stomach">https://www.proteinatlas.org/ENSG00000107159-CA9/tissue/stomach</a><br>Recombinant Antibodies |
| CD24             | 130-095-954 | Flow     | 1:20          | MiltenyiBiotec | Manufacture validation on Human peripheral blood cells after erythrocyte lysis. Validated on multiple breast cancer cell lines with know expression of CD24. MDA-MB-231 cells possess both a negative and positive population and T47D cells are primarily CD24 positive. Expression is also tested against a Isotype control.<br><br>Product citations: 2 (APC only)<br>Mouse mAb                                     |
| CD44             | 550989      | Flow     | 1:5           | MiltenyiBiotec | Manufacture validation on Human peripheral blood mononuclear cells .Validated on multiple breast cancer cell lines with know expression of CD44. MDA-MB-231 and SUM149 cells are primarily for CD44 expression. Expression is also tested against an Isotype control.<br><br>Product citations: 7 (Vioblu only)<br>Mouse mAb                                                                                           |
| CD24             | 555428      | Flow     | 1:5           | BDBioscience   | Validated on multiple breast cancer cell lines with know expression of CD24. MDA-MB-231 cells possess both a negative and positive population and T47D cells are primarily CD24 positive. Expression is also tested against an Isotype control.<br><br>Product citations: 122 (FITC only)<br>Mouse mAb                                                                                                                 |
| CD44             | 550989      | Flow     | 1:5           | BDBioscience   | Validated on multiple breast cancer cell lines with know expression of CD44. MDA-MB-231 and SUM149 cells are primarily for CD44 expression. Expression is also tested against an Isotype control.<br><br>Product citations: 55 (PE only)<br>eIF2 $\alpha$ Antibody Rabbit pAb                                                                                                                                          |
| eIF2 $\alpha$    | 9722        | WB       | 1:1000        | Cell Signaling | Validated for western blot in conjunction with Phospho-eIF2 $\alpha$ in response to thapsigargin.<br><br>Product citations: 328<br>Phospho-eIF2 $\alpha$ (Ser51) Antibody Rabbit pAb                                                                                                                                                                                                                                   |
| eIF2 $\alpha$ -P | 9721        | WB       | 1:1000        | Cell Signaling | Validated western blot in conjunction with eIF2 $\alpha$ in response to thapsigargin.<br><br>Product citations: 382                                                                                                                                                                                                                                                                                                    |



Supplementary Table 2. Antibodies Used Continued

| Target                  | Cat #     | Protocol | Dilution | Source                  | Validation                                                                                                                                                                                                                                                                                                                                                                                       |
|-------------------------|-----------|----------|----------|-------------------------|--------------------------------------------------------------------------------------------------------------------------------------------------------------------------------------------------------------------------------------------------------------------------------------------------------------------------------------------------------------------------------------------------|
|                         |           |          |          |                         | Mouse pAb<br>Antibody was validated by pathologist Dr. Martin Koebel, University of Calgary, AB Canada using knockout cell lines and tumour microarrays.<br>Species reactivity: Human                                                                                                                                                                                                            |
| Nodal                   | PA5-28486 | IHC      | 1:1000   | ThermoFisher Scientific | Citations: 11<br>Mouse mAb<br>Western blot analysis of Nodal expression in HeLa whole cell lysate and human recombinant Nodal fusion protein                                                                                                                                                                                                                                                     |
| Nodal                   | sc81953   | WB       | 1:1000   | Santa Cruz              | Citations: 4<br>Rabbit mAb<br>Western blot analysis of extracts from NTERA2 and mouse embryonic stem cells (mESCs) using Oct-4A (C30A3), H9, and H1 hESC lysate.                                                                                                                                                                                                                                 |
| Oct4                    | 2840      | WB       | 1:1000   | Cell Signaling          | Citation: 64<br>Rabbit mAb<br>Immunohistochemical analysis of paraffin-embedded human colon carcinoma using Phospho-4E-BP1 (Thr37/46) (236B4) Rabbit mAb.<br>Species reactivity: Human, mouse, rat, monkey, D. melanogaster                                                                                                                                                                      |
| P-4E-BP                 | 2855      | IHC      | 1:1600   | Cell Signaling          | Citations: 502<br>Rabbit pAb<br>Western blot analysis of extracts from 293 cells using 4E-BP1 Antibody #9644 and Phospho-4E-BP1 (Ser65) Antibody #9451. The cells were starved for 24 hours in serum-free medium and underwent a 1 hour amino acid deprivation. Amino acids were replenished for 1 hour. Cells were then either untreated (-) or treated with 100 nM insulin (+) for 30 minutes. |
| phospho-4EBP1 (S65)     | 9451      | WB       | 1:1000   | Cell Signaling          | Citations: 190<br>Rabbit pAb<br>Western blot analysis of extracts from 293 cells, untreated or treated with 20% FBS for the indicated time, using Phospho-S6 Ribosomal Protein (Ser235/236) Antibody #2211 and Phospho-S6 Ribosomal Protein (Ser240/244) Antibody #2215.                                                                                                                         |
| phospho-RPS6 (S240/244) | 2215      | WB       | 1:1000   | Cell Signaling          | Citations: 334<br>Rabbit Monoclonal Antibody<br>Western blot analysis of extracts from A204, SKMEL5, and NIH/3T3 cells using Slug (C19G7) Rabbit mAb.                                                                                                                                                                                                                                            |
| Slug                    | 9585      | WB       | 1:1000   | Cell Signaling          | Citations: 203<br>Rabbit mAb<br>Western blot analysis of extracts from HCT116, HeLa, NIH/3T3, Rat2, and COS cells using Snail (C15D3) Rabbit mAb.                                                                                                                                                                                                                                                |
| Snail                   | 3879      | WB       | 1:1000   | Cell Signaling          | Citations: 209<br>Rabbit mAb<br>Western blot analysis of extracts from NTERA2 and NCCIT cells using Sox2 (D6D9) XP® Rabbit mAb.                                                                                                                                                                                                                                                                  |
| Sox                     | 3579      | WB       | 1:1000   | Cell Signaling          | Citations: 98<br>Rabbit mAb<br>Western blot analysis of extracts from HeLa, NIH/3T3, PC12 and COS cells using S6 Ribosomal Protein (5G10) Rabbit mAb.                                                                                                                                                                                                                                            |
| Total RPS6              | 2217      | WB       | 1:1000   | Li-cor                  | Citations: 683<br>Rabbit pAb<br>Twist detected via western blot in 293T WT and 293T-Twist transfected cell lysate. Twist staining in murine brain tissue by immunohistochemistry.                                                                                                                                                                                                                |
| Twist                   | ab50581   | WB       | 1:1000   | Abcam                   | Citations: 52<br>Rabbit pAb<br>Western blotting using MCF7, rat brain, mouse and rat kidney, mouse bone tissue, and immunofluorescence in HUVEC cells.                                                                                                                                                                                                                                           |
| VEGFA                   | A12303    | WB       | 1:1000   | ABclonal                | Citations: 3<br>Mouse mAb<br>$\alpha$ -Tubulin detected via western blot in HeLa, NIH/3T3, and COS7 cell lysates using 926-42211 and IRDye 680LT Goat Anti-Mouse.                                                                                                                                                                                                                                |
| $\alpha$ -Tubulin       | 926-42213 | WB       | 1:1000   | Li-cor                  | Rabbit mAb<br>Western blot analysis of cell extracts from NIH/3T3, HeLa, PAE, and A431 cell lysates using beta-Actin (13E5) Rabbit mAb.                                                                                                                                                                                                                                                          |
| $\beta$ -Actin          | 4970      | WB       | 1:1000   | Cell Signaling          | Product citations: 1102<br>Rabbit pAb<br>$\beta$ -Tubulin detected via western blot in HeLa, NIH/3T3, and COS7 cell lysates using 926-42211 and IRDye 680 Goat Anti-Rabbit.                                                                                                                                                                                                                      |
| $\beta$ -Tubulin        | 926-42211 | WB       | 1:1000   | Cell Signaling          |                                                                                                                                                                                                                                                                                                                                                                                                  |

Supplementary Table 3. Primer Probes Used

| Gene           | Cat #    | Assay ID       |
|----------------|----------|----------------|
| Actin          | 4331182  | HS01060665_g1  |
| ATF4           | 4331182  | Hs00909569_g1  |
| ATF4           | 12001950 | qMmuCEP0056683 |
| EEF2           | 4331182  | Hs00157330_m1  |
| Lox            | 4331182  | Hs00942480_m1  |
| Nanog          | 4331182  | Hs04260366_g1  |
| Nodal          | 4331182  | Hs00415443_m1  |
| Oct4           | 4331182  | HS04260367_g1  |
| RPS8           | 4331182  | Hs04195024_g1  |
| Slug           | 4331182  | HS009500344_g1 |
| Snail (snai1)  | 4331182  | Hs00195591_m1  |
| Sox2           | 4331182  | Hs01053049_s1  |
| Twist          | 4331182  | Hs01675818_s1  |
| Vegf           | 4331182  | Hs00900055_ml  |
| Vimentin (VIM) | 4331182  | HS00185584_m1  |
| Zeb1           | 4331182  | Hs00232783_m1  |

Supplementary Table 4. G Blocks Used in Luciferase Reporter Assays

gBlock Sequences:

>Nanog\_350

ATATATATCGTCTCAACACCGAGCGACCCTGCATAAGCTTGACACAATGGGACAGGGAGCGGGGGATGGGGGAATTCAGCTCAGGCTTT  
TATGCAAAGACCCCTTCTGCAAAGAACAAAGCTTCTGGTACCTGCCCTTGGAGAGCTGCGGGCAAGCTCAGCCTCGAAACACACACA  
CCCACACGAGATGGGCACGGAGTAGTCTTGAAGACATGACAAATCACCAGACCTGGGAAGAAGCTAAAGAGCCAGAGGAAAAAGCC  
AGAAGTCGACTACCTGGGAGGAGGATAGACAAGAAACAACTAAAGGAACTAAGTGTGGATCCAGCTTGCCCCAAGCTTGCCTT  
GCTTTGAAGCATCCGACTGTAAAGAATCTCACCTATGGAAGAGAGACGTATATATA

>Nanog\_219

ATATATATCGTCTCAACACCGAGCGACCCTGCATAAGCTTTTCAATATAAATCTAGAGACTCCAGGATTTTAACTTCTGCTGGACTGAGC  
TGTTGCTCATGTTATTATGCAGGCAACTCACTTTATCCCAATTTCTTGATACTTTCTCTTGGAGGTCCTATTTCTCTAACATCTCCAG  
AAAAGTCTTAAAGCTGCCTTAACTTTTTCCAGTCCACCTCTTAAATTTTTCTCTCTCTCTACTAACATGGAAGAGAGACGTATA  
TATA

>Snail\_85

ATATATATCGTCTCAACACCGAGCGACCCTGCATAAGCTTCATTTCGCGCCGCGCACGGCCTAGCGAGTGGTTCTTCTGCGCTACTG  
CTGCGCGAATCGGCGACCCAGTGCCTCGACCCTATGGAAGAGAGACGTATATATA

>NODAL\_298

ATATATATCGTCTCAACACCGAGCGACCCTGCATAAGCTTCAGCATCAAGGCGTTTGGTACCTAGAGGAGCAGGGTGCCAGGGTGCCA  
GACCGGGCAAACAGGAGCCCTAGATCCCGTCCCTGGAAGTGGTCCCGCCAGCTTTCGCGGCCTCCTCCGACCCAGGCTCAGGTC  
TCGCCATCCCGAGCAGGAGTCTCTGCCCCCACCCTCCGAGGGGGTATATGATCTTAAAGCTTCCAGAGGAGGAAAGG  
TGGGGCGGGGGCTGCTGAGGCCAGGATATAAGGCTGGAGGTGCTGCTTTCAGGCTGGCCAGCCACCATGGAAGAGAGACG  
TATATATA

>NODAL\_42

CCTGGAAGTGGTCTCCGCCAGCTTTCGCGGCCTCCTCCATATATATCGTCTCAACACCGAGCGACCCTGCATAAGCTTATAAGGGCT  
GGAGGTGCTGCTTTCAGGCTGGCCAGCCACCATGGAAGAGAGACGTATATATA

>NODAL\_14

CCTGGAAGTGGTCTCCGCCAGCTTTCGCGGCCTCCTCCATATATATCGTCTCAACACCGAGCGACCCTGCATAAGCTTCTGGCCAGC  
CCACCATGGAAGAGAGACGTATATATAATGCAGCCCACTGCCTGCCCTTCTCTGCACGCCTGGT

>NODAL\_ALT

ATATATATCGTCTCAACACCGAGCGACCCTGCATAAGCTTACCAGGCAGGATGGGGGATGGGGCAACAAGGGTAACACCTTCTCCT  
CTGAAACTCACTGGGGTGTGCTGCCTGTGGGGAAAAAGCCTGATGAACCAGGATCACCCGTTGGCTCCATCTGGCTCCAGCTTCTGC  
TGAACACTCCCTTTTCAAGTGGAGAAGTCATCGTCTGGTCCCTCCTGCCCTTGTCTTCCCAGGAAAGCACTTCACTATTGGTAGGG  
CCAGGGGTGCTCCCCAGGCCATCTAGACAGTGGCCAGGAGGCTGCGCCAGCCAGATTGTGTCAAAGTCTGCTGAGAGCCACGAG  
GATCCCTCGGCATTTCTTCTGCTTCTGAGGAGCCTGCGGTCCATTTGCAGCCTGAGTGGAGAGGATGGGGCAGGGATCCAGGCT  
GCCAGCCACCATGGAAGAGAGACGTATATATA
